# Supplementary material for: Neutrophil depletion enhances the therapeutic effect of PD-1 antibody on glioma
Source: Aging (Albany NY). 2020 Aug 4;12(15):15290–301. doi: 10.18632/aging.103428 (PMC7467393; doi:10.18632/aging.103428)
Supplement: Supplementary Figures [file aging-12-103428-s002..pdf]

## SUPPLEMENTARY FIGURES

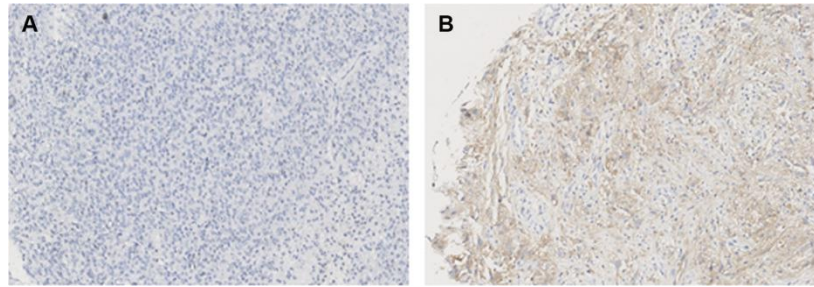

**Supplementary Figure 1. Representative image of PD-L1 expression in gliomas.** (A) Negative membrane staining for PD-L1. (B) Positive membrane staining for PD-L1.

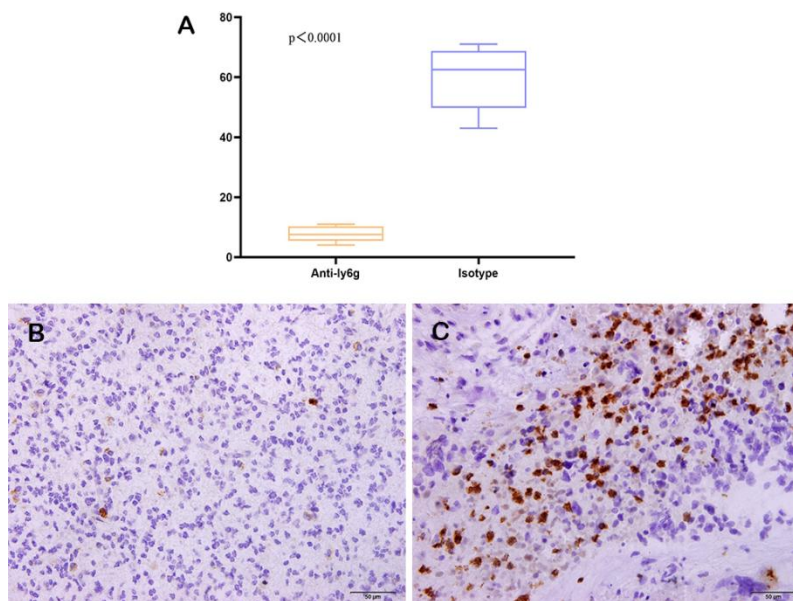

**Supplementary Figure 2 The experiment of neutrophil depletion.** There were six mice treated with. TINs were significantly decreased in the group treated with anti-Ly6G antibody (A). The representative image of IHC from six mice, which were treated with anti-Ly6G antibody (B) or matched isotype (C).
