# Supplementary material for: Neutrophil depletion enhances the therapeutic effect of PD-1 antibody on glioma
Source: publisher site journal article supplement (doi:10.18632/aging.103428), 2020-08-04
Supplement: Supplementary file [file aging-v12i15-103428-supplementary-material-SD2.pdf]

## SUPPLEMENTARY TABLE

**Supplementary Table 1. Baseline characteristics.**

---

|                              |                   |
|------------------------------|-------------------|
| <b>Age</b>                   |                   |
| Mean $\pm$ SD                | 47.11 $\pm$ 14.91 |
| Median (range)               | 47 (10-86)        |
| <b>Gender</b>                |                   |
| Female                       | 92 (45.5%)        |
| Male                         | 110 (54.5%)       |
| <b>Tumor grade</b>           |                   |
| LGG                          | 52 (25.7%)        |
| GBM                          | 150 (74.3%)       |
| <b>IDH-1<sup>R132H</sup></b> |                   |
| Mutation                     | 55 (27.2%)        |
| Wild type                    | 147 (72.8%)       |
| <b>TIN (No./Sample)</b>      |                   |
| Median (range)               | 183 (2-1763)      |
| <b>Radiotherapy</b>          |                   |
| Yes                          | 123 (74.1%)       |
| No                           | 43 (25.9%)        |
| <b>Chemotherapy</b>          |                   |
| Yes                          | 126 (75.9%)       |
| No                           | 40 (24.1%)        |

---
